# Supplementary material for: Comprehensive proteomics investigation of P. vivax-infected human plasma and parasite isolates
Source: Springer Nature journal article supplement (doi:10.1186/s12879-020-4885-3), 2020-03-02

## Additional Information

**Additional table 1.** *P. vivax* proteins in plasma samples and parasite isolates (Criteria: Number of patients, number of peptides, 1% FDR cut-off)

| <b>PLASMA SAMPLES</b>                           |              |                                                        |                    |
|-------------------------------------------------|--------------|--------------------------------------------------------|--------------------|
| Proteins found in $\geq 2/12$ plasma samples    |              |                                                        |                    |
| S.No                                            | Accession ID | Protein description                                    | Number of patients |
| 1                                               | PVX_099315   | heat shock protein 70                                  | 4                  |
| 2                                               | PVX_081832   | Plasmodium exported protein                            | 4                  |
| 3                                               | PVX_083555   | hypothetical protein location                          | 3                  |
| 4                                               | PVX_083560   | Plasmodium exported protein                            | 3                  |
| 5                                               | PVX_087950   | heat shock protein 86                                  | 3                  |
| 6                                               | PVX_089425   | heat shock 70 kDa protein                              | 3                  |
| 7                                               | PVX_091515   | GTP-binding nuclear protein RAN/TC4                    | 3                  |
| 8                                               | PVX_093680   | Phist protein (Pf-fam-b) location                      | 3                  |
| 9                                               | PVX_094635   | tubulin beta chain                                     | 3                  |
| 10                                              | PVX_097583   | skeleton-binding protein 1                             | 3                  |
| 11                                              | PVX_099525   | S-adenosylmethionine synthetase                        | 3                  |
| 12                                              | PVX_099535   | phosphoglycerate kinase                                | 3                  |
| 13                                              | PVX_101200   | actin location                                         | 3                  |
| 14                                              | PVX_115450   | hypothetical protein                                   | 3                  |
| 15                                              | PVX_117322   | glyceraldehyde-3-phosphate dehydrogenase               | 3                  |
| 16                                              | PVX_001650   | Pv-fam-d protein location                              | 2                  |
| 17                                              | PVX_003545   | Plasmodium exported protein                            | 2                  |
| 18                                              | PVX_003555   | Plasmodium exported protein                            | 2                  |
| 19                                              | PVX_081265   | chromatin assembly factor 1 protein WD40 domain        | 2                  |
| 20                                              | PVX_082845   | elongation factor 1-gamma                              | 2                  |
| 21                                              | PVX_084940   | voltage-dependent anion-selective channel protein      | 2                  |
| 22                                              | PVX_085275   | 60S ribosomal protein L5                               | 2                  |
| 23                                              | PVX_088960   | protein disulfide isomerase                            | 2                  |
| 24                                              | PVX_089505   | 14-3-3 protein                                         | 2                  |
| 25                                              | PVX_090070   | ran binding protein 1                                  | 2                  |
| 26                                              | PVX_090160   | 40S ribosomal protein S19                              | 2                  |
| 27                                              | PVX_091105   | endoplasmic reticulum-resident calcium binding protein | 2                  |
| 28                                              | PVX_091640   | phosphoglycerate mutase                                | 2                  |
| 29                                              | PVX_092065   | spermidine synthase                                    | 2                  |
| 30                                              | PVX_094303   | Pvstp1                                                 | 2                  |
| 31                                              | PVX_095000   | heat shock protein 60                                  | 2                  |
| 32                                              | PVX_096070   | early transcribed membrane protein (ETRAMP) location   | 2                  |
| 33                                              | PVX_101400   | osmiophilic body protein                               | 2                  |
| 34                                              | PVX_117030   | RNA helicase-1                                         | 2                  |
| 35                                              | PVX_117925   | elongation factor 2                                    | 2                  |
| 36                                              | PVX_121935   | Plasmodium exported protein                            | 2                  |
| 37                                              | PVX_123745   | endoplasmin                                            | 2                  |
| 38                                              | PVX_090970   | hypothetical protein                                   | 2                  |
| <b>PARASITE ISOLATES</b>                        |              |                                                        |                    |
| Proteins found in $\geq 50$ % parasite isolates |              |                                                        |                    |
| S.No                                            | Accession ID | Product Description                                    | Number of patients |
| 1                                               | PVX_094303   | Pvstp1, putative                                       | 14                 |
| 2                                               | PVX_093680   | Phist protein (Pf-fam-b)                               | 14                 |

|    |            |                                                                 |    |
|----|------------|-----------------------------------------------------------------|----|
| 3  | PVX_115450 | hypothetical protein, conserved                                 | 14 |
| 4  | PVX_003555 | Plasmodium exported protein, unknown function                   | 13 |
| 5  | PVX_087950 | heat shock protein 86, putative                                 | 13 |
| 6  | PVX_089425 | heat shock 70 kDa protein, putative                             | 13 |
| 7  | PVX_094635 | tubulin beta chain, putative                                    | 13 |
| 8  | PVX_097583 | skeleton-binding protein 1, putative                            | 13 |
| 9  | PVX_101200 | actin                                                           | 13 |
| 10 | PVX_003545 | Plasmodium exported protein, unknown function                   | 12 |
| 11 | PVX_083560 | Plasmodium exported protein, unknown function                   | 12 |
| 12 | PVX_089505 | 14-3-3 protein, putative                                        | 12 |
| 13 | PVX_092070 | parasitophorous vacuolar protein 1, putative                    | 12 |
| 14 | PVX_095000 | heat shock protein 60, putative                                 | 12 |
| 15 | PVX_099315 | heat shock protein 70, putative                                 | 12 |
| 16 | PVX_099525 | S-adenosylmethionine synthetase, putative                       | 12 |
| 17 | PVX_117030 | RNA helicase-1, putative                                        | 12 |
| 18 | PVX_121930 | Plasmodium exported protein, unknown function                   | 12 |
| 19 | PVX_080100 | multidrug resistance protein 1, putative                        | 11 |
| 20 | PVX_092065 | spermidine synthase, putative                                   | 11 |
| 21 | PVX_118145 | 40S ribosomal protein S5, putative                              | 11 |
| 22 | PVX_092990 | tryptophan-rich antigen (Pv-fam-a)                              | 10 |
| 23 | PVX_092995 | tryptophan-rich antigen (Pv-fam-a)                              | 10 |
| 24 | PVX_088960 | protein disulfide isomerase, putative                           | 10 |
| 25 | PVX_091470 | heat shock protein 101, putative                                | 10 |
| 26 | PVX_100835 | conserved protein, unknown function                             | 10 |
| 27 | PVX_101400 | osmiophilic body protein, putative                              | 10 |
| 28 | PVX_123340 | eukaryotic translation initiation factor 3 subunit 10, putative | 10 |
| 29 | PVX_096975 | VIR protein                                                     | 9  |
| 30 | PVX_112670 | unspecified product                                             | 9  |
| 31 | PVX_090265 | tryptophan-rich antigen (Pv-fam-a)                              | 9  |
| 32 | PVX_083240 | 6-cysteine protein                                              | 9  |
| 33 | PVX_083515 | protein disulfide-isomerase, putative                           | 9  |
| 34 | PVX_091515 | GTP-binding nuclear protein RAN/TC4, putative                   | 9  |
| 35 | PVX_091700 | circumsporozoite-related antigen, putative                      | 9  |
| 36 | PVX_095080 | 40S ribosomal protein S3A, putative                             | 9  |
| 37 | PVX_096070 | early transcribed membrane protein (ETRAMP)                     | 9  |
| 38 | PVX_097915 | 60S ribosomal protein L4, putative                              | 9  |
| 39 | PVX_114315 | hexokinase, putative                                            | 9  |
| 40 | PVX_116915 | exported protein 2, putative                                    | 9  |
| 41 | PVX_117170 | 40S ribosomal protein S3, putative                              | 9  |
| 42 | PVX_117322 | glyceraldehyde-3-phosphate dehydrogenase, putative              | 9  |
| 43 | PVX_117615 | signal peptide peptidase, putative                              | 9  |
| 44 | PVX_117625 | V-type H(+)-translocating pyrophosphatase, putative             | 9  |
| 45 | PVX_001685 | Phist protein (Pf-fam-b)                                        | 8  |
| 46 | PVX_094295 | Pv-fam-h protein                                                | 8  |
| 47 | PVX_096995 | tryptophan-rich antigen (Pv-fam-a)                              | 8  |
| 48 | PVX_118695 | Pv-fam-d protein                                                | 8  |
| 49 | PVX_121935 | Plasmodium exported protein, unknown function                   | 8  |
| 50 | PVX_002650 | 40S ribosomal protein S26, putative                             | 8  |
| 51 | PVX_003665 | hexose transporter                                              | 8  |
| 52 | PVX_003905 | 6-cysteine protein                                              | 8  |
| 53 | PVX_080440 | 40S ribosomal protein S11, putative                             | 8  |

|     |            |                                                                   |   |
|-----|------------|-------------------------------------------------------------------|---|
| 54  | PVX_082840 | 60S ribosomal protein L6, putative                                | 8 |
| 55  | PVX_082845 | elongation factor 1-gamma, putative                               | 8 |
| 56  | PVX_083045 | phosphoethanolamine N-methyltransferase                           | 8 |
| 57  | PVX_089635 | phosphoglucomutase-2, putative                                    | 8 |
| 58  | PVX_090155 | tubulin alpha chain, putative                                     | 8 |
| 59  | PVX_094400 | 60S ribosomal protein L13a, putative                              | 8 |
| 60  | PVX_094535 | RNA-binding protein, putative                                     | 8 |
| 61  | PVX_095015 | enolase, putative                                                 | 8 |
| 62  | PVX_096265 | 40S ribosomal protein S5, putative                                | 8 |
| 63  | PVX_099055 | alkaline phosphatase, putative                                    | 8 |
| 64  | PVX_113465 | long chain polyunsaturated fatty acid elongation enzyme, putative | 8 |
| 65  | PVX_114095 | cell division cycle protein 48 homologue, putative                | 8 |
| 66  | PVX_114445 | pyruvate kinase, putative                                         | 8 |
| 67  | PVX_117925 | elongation factor 2, putative                                     | 8 |
| 68  | PVX_122930 | histone H2B variant, putative                                     | 8 |
| 69  | PVX_123845 | polyadenylate-binding protein, putative                           | 8 |
| 70  | PVX_123935 | haloacid dehalogenase-like hydrolase, putative                    | 8 |
| 71  | PVX_083555 | hypothetical protein                                              | 7 |
| 72  | PVX_090275 | tryptophan-rich antigen (Pv-fam-a)                                | 7 |
| 73  | PVX_096985 | variable surface protein Vir, putative                            | 7 |
| 74  | PVX_101515 | tryptophan-rich antigen (Pv-fam-a)                                | 7 |
| 75  | PVX_112110 | unspecified product                                               | 7 |
| 76  | PVX_115460 | Plasmodium exported protein, unknown function                     | 7 |
| 77  | PVX_003730 | 26S proteasome regulatory subunit RPN1, putative                  | 7 |
| 78  | PVX_080400 | 60S ribosomal protein L12, putative                               | 7 |
| 79  | PVX_080405 | 60S ribosomal protein L2, putative                                | 7 |
| 80  | PVX_080555 | 6-cysteine protein                                                | 7 |
| 81  | PVX_080650 | inositol-3-phosphate synthase, putative                           | 7 |
| 82  | PVX_081455 | calcium-transporting ATPase, putative                             | 7 |
| 83  | PVX_083205 | protein transport protein SEC61 subunit alpha, putative           | 7 |
| 84  | PVX_083270 | DNA/RNA-binding protein Alba 4, putative                          | 7 |
| 85  | PVX_084795 | mitochondrial acidic protein MAM33, putative                      | 7 |
| 86  | PVX_085645 | hypothetical protein, conserved                                   | 7 |
| 87  | PVX_085735 | 60S ribosomal protein L10, putative                               | 7 |
| 88  | PVX_085830 | actin II                                                          | 7 |
| 89  | PVX_086020 | 40S ribosomal protein S8e, putative                               | 7 |
| 90  | PVX_088205 | vacuolar proton translocating ATPase subunit A, putative          | 7 |
| 91  | PVX_089025 | receptor for activated c kinase, putative                         | 7 |
| 92  | PVX_090950 | 40S ribosomal protein S4, putative                                | 7 |
| 93  | PVX_091790 | hypothetical protein, conserved                                   | 7 |
| 94  | PVX_092120 | 60S acidic ribosomal protein P0, putative                         | 7 |
| 95  | PVX_092310 | heat shock protein 70, putative                                   | 7 |
| 96  | PVX_092315 | protein disulfide isomerase, putative                             | 7 |
| 97  | PVX_094375 | 40S ribosomal protein S20e, putative                              | 7 |
| 98  | PVX_097625 | merozoite surface protein 8, putative                             | 7 |
| 99  | PVX_097845 | hypothetical protein, conserved                                   | 7 |
| 100 | PVX_098712 | high molecular weight rhoptry protein 3, putative                 | 7 |
| 101 | PVX_099370 | DNAJ-like molecular chaperone protein, putative                   | 7 |
| 102 | PVX_100735 | ATP synthase subunit beta, mitochondrial, putative                | 7 |
| 103 | PVX_123070 | 60S ribosomal protein L13, putative                               | 7 |

**Additional table 2.** Sequence alignment data for unique proteins obtained from parasite pellets using pBLAST

| Proteins   | <i>P. falciparum</i>                                  |          |           | <i>Homo sapiens</i>                           |          |          |
|------------|-------------------------------------------------------|----------|-----------|-----------------------------------------------|----------|----------|
|            | Name                                                  | Identity | E value   | Name                                          | Identity | E value  |
| PVX_094303 | STP1 protein                                          | 39%      | 3e-95     | -                                             | -        | -        |
| PVX_003555 | Plasmodium exported protein, unknown function         | 42%      | 9e-43     | uncharacterized protein<br>LOC107987394       | 33%      | 3e-04    |
| PVX_003545 | Plasmodium exported protein, unknown function         | 41%      | 6e-39     | -                                             | -        | -        |
| PVX_092990 | tryptophan-rich protein                               | 37%      | 1e-56     | apolipoprotein B48 receptor, isoform<br>CRA_a | 44%      | 1.4      |
| PVX_092995 | tryptophan-rich protein                               | 31%      | 2.00E-23  | -                                             | -        | -        |
| PVX_096975 | PIR protein                                           | 37%      | 7.00E-60  | -                                             | -        | -        |
| PVX_112670 | tryptophan-rich protein                               | 48%      | 3.00E-108 | -                                             | -        | -        |
| PVX_001685 | Plasmodium exported protein (PHIST), unknown function | 53%      | 7.00E-51  | -                                             | -        | -        |
| PVX_094295 | Plasmodium exported protein, unknown function         | 43%      | 1.00E-71  | unnamed protein product                       | 40%      | 8.7      |
| PVX_096995 | tryptophan-rich protein                               | 65%      | 8.00E-164 | -                                             | -        | -        |
| PVX_118695 | phist protein                                         | 37%      | 1.00E-31  | KIAA0754 protein                              | 20%      | 4.00E-15 |
| PVX_121935 | hypothetical protein<br>PFMC_04220                    | 21%      | 0.005     | -                                             | -        | -        |
| PVX_083555 | Hypothetical protein<br>POCGH01_12010100              | 55%      | 1.00E-22  | -                                             | -        | -        |
| PVX_096985 | PIR protein                                           | 33%      | 1.00E-44  | -                                             | -        | -        |
| PVX_101515 | tryptophan-rich protein                               | 55%      | 5.00E-85  | -                                             | -        | -        |
| PVX_112110 | Plasmodium exported protein (PHIST), unknown function | 61%      | 9.00E-115 | trophinin isoform 5                           | 46%      | 0.004    |
| PVX_115460 | conserved Plasmodium protein, unknown function        | 42%      | 4.00E-05  | -                                             | -        | -        |

**Additional table 3.** *P. vivax* proteins found in both plasma and parasite isolates

| S. No | Gene ID    | Product Description                           | Computed GO Components                                              | Computed GO Processes                                                                                                                                                                                                              |
|-------|------------|-----------------------------------------------|---------------------------------------------------------------------|------------------------------------------------------------------------------------------------------------------------------------------------------------------------------------------------------------------------------------|
| 1     | PVX_003545 | Plasmodium exported protein, unknown function | membrane                                                            | -                                                                                                                                                                                                                                  |
| 2     | PVX_003555 | Plasmodium exported protein, unknown function | -                                                                   | -                                                                                                                                                                                                                                  |
| 3     | PVX_082845 | elongation factor 1-gamma, putative           | eukaryotic translation elongation factor 1 complex                  | translational elongation                                                                                                                                                                                                           |
| 4     | PVX_083555 | hypothetical protein                          | -                                                                   | -                                                                                                                                                                                                                                  |
| 5     | PVX_083560 | Plasmodium exported protein, unknown function | -                                                                   | -                                                                                                                                                                                                                                  |
| 6     | PVX_087950 | heat shock protein 86, putative               | -                                                                   | protein folding, response to heat, response to stress, response to unfolded protein                                                                                                                                                |
| 7     | PVX_088960 | protein disulfide isomerase, putative         | endoplasmic reticulum, endoplasmic reticulum lumen                  | cell redox homeostasis, glycerol ether metabolic process, obsolete electron transport, protein folding                                                                                                                             |
| 8     | PVX_089425 | heat shock 70 kDa protein, putative           | -                                                                   | response to heat, response to unfolded protein                                                                                                                                                                                     |
| 9     | PVX_089505 | 14-3-3 protein, putative                      | -                                                                   | -                                                                                                                                                                                                                                  |
| 10    | PVX_091515 | GTP-binding nuclear protein RAN/TC4, putative | intracellular, membrane, nucleus                                    | RNA export from nucleus, intracellular protein transport, nucleocytoplasmic transport, obsolete GTP catabolic process, protein transport, regulation of cell cycle, signal transduction, small GTPase mediated signal transduction |
| 11    | PVX_092065 | spermidine synthase, putative                 | -                                                                   | spermidine biosynthetic process                                                                                                                                                                                                    |
| 12    | PVX_093680 | Phist protein (Pf-fam-b)                      | apicoplast                                                          | -                                                                                                                                                                                                                                  |
| 13    | PVX_094303 | Pvstp1, putative                              | -                                                                   | -                                                                                                                                                                                                                                  |
| 14    | PVX_094635 | tubulin beta chain, putative                  | cytoplasm, microtubule, protein-containing complex, tubulin complex | microtubule polymerization, microtubule-based movement, obsolete GTP catabolic process, protein polymerization                                                                                                                     |
| 15    | PVX_095000 | heat shock protein 60, putative               | cytoplasm, mitochondrion                                            | cellular protein metabolic process, protein refolding, protein targeting to mitochondrion, response to unfolded protein                                                                                                            |
| 16    | PVX_096070 | early transcribed membrane protein (ETAMP)    | -                                                                   | -                                                                                                                                                                                                                                  |

|    |            |                                                    |                                                     |                                                                         |
|----|------------|----------------------------------------------------|-----------------------------------------------------|-------------------------------------------------------------------------|
| 17 | PVX_097583 | skeleton-binding protein 1, putative               | -                                                   | -                                                                       |
| 18 | PVX_099315 | heat shock protein 70, putative                    | -                                                   | -                                                                       |
| 19 | PVX_099525 | S-adenosylmethionine synthetase, putative          | -                                                   | S-adenosylmethionine biosynthetic process, one-carbon metabolic process |
| 20 | PVX_101200 | actin                                              | actin cytoskeleton, actin filament                  | cytoskeleton organization                                               |
| 21 | PVX_101400 | osmiophilic body protein, putative                 | -                                                   | -                                                                       |
| 22 | PVX_115450 | hypothetical protein, conserved                    | -                                                   | -                                                                       |
| 23 | PVX_117030 | RNA helicase-1, putative                           | eukaryotic translation initiation factor 4F complex | regulation of translational initiation                                  |
| 24 | PVX_117322 | glyceraldehyde-3-phosphate dehydrogenase, putative | -                                                   | glucose metabolic process, oxidation-reduction process                  |
| 25 | PVX_117925 | elongation factor 2, putative                      | -                                                   | translation, translational elongation                                   |
| 26 | PVX_121935 | Plasmodium exported protein, unknown function      | -                                                   | -                                                                       |

**Additional table 4A.** GO classification of *P. vivax* proteins detected in plasma

| Gene ID    | Product Description                                              | Gene Name or Symbol | Computed GO Components                                                    |
|------------|------------------------------------------------------------------|---------------------|---------------------------------------------------------------------------|
| PVX_001650 | Pv-fam-d protein                                                 | null                | -                                                                         |
| PVX_003545 | Plasmodium exported protein, unknown function                    | null                | membrane                                                                  |
| PVX_003555 | Plasmodium exported protein, unknown function                    | null                | -                                                                         |
| PVX_081265 | chromatin assembly factor 1 protein WD40 domain, putative        | null                | obsolete chromatin assembly complex                                       |
| PVX_081832 | Plasmodium exported protein, unknown function                    | null                | -                                                                         |
| PVX_082845 | elongation factor 1-gamma, putative                              | EF1                 | eukaryotic translation elongation factor 1 complex                        |
| PVX_083555 | hypothetical protein                                             | null                | -                                                                         |
| PVX_083560 | Plasmodium exported protein, unknown function                    | null                | -                                                                         |
| PVX_084940 | voltage-dependent anion-selective channel protein, putative      | null                | mitochondrial outer membrane, mitochondrion                               |
| PVX_085275 | 60S ribosomal protein L5, putative                               | RPL5                | cytosolic large ribosomal subunit, intracellular, mitochondrion, ribosome |
| PVX_087950 | heat shock protein 86, putative                                  | null                | -                                                                         |
| PVX_088960 | protein disulfide isomerase, putative                            | null                | endoplasmic reticulum, endoplasmic reticulum lumen                        |
| PVX_089425 | heat shock 70 kDa protein, putative                              | null                | -                                                                         |
| PVX_089505 | 14-3-3 protein, putative                                         | 14-3-3I             | -                                                                         |
| PVX_090070 | ran binding protein 1, putative                                  | null                | -                                                                         |
| PVX_090160 | 40S ribosomal protein S19, putative                              | RPS19               | intracellular, ribosome                                                   |
| PVX_090970 | hypothetical protein, conserved                                  | null                | membrane                                                                  |
| PVX_091105 | endoplasmic reticulum-resident calcium binding protein, putative | ERC                 | endoplasmic reticulum                                                     |
| PVX_091515 | GTP-binding nuclear protein RAN/TC4, putative                    | null                | intracellular, membrane, nucleus                                          |
| PVX_091640 | phosphoglycerate mutase, putative                                | null                | cytosol                                                                   |
| PVX_092065 | spermidine synthase, putative                                    | null                | -                                                                         |
| PVX_093680 | Phist protein (Pf-fam-b)                                         | null                | apicoplast                                                                |
| PVX_094303 | Pvstp1, putative                                                 | null                | -                                                                         |
| PVX_094635 | tubulin beta chain, putative                                     | null                | cytoplasm, microtubule, protein-containing complex, tubulin complex       |
| PVX_095000 | heat shock protein 60, putative                                  | null                | cytoplasm, mitochondrion                                                  |
| PVX_096070 | early transcribed membrane protein (ETRAMP)                      | null                | -                                                                         |
| PVX_097583 | skeleton-binding protein 1, putative                             | SBP1                | -                                                                         |
| PVX_099315 | heat shock protein 70, putative                                  | null                | -                                                                         |
| PVX_099525 | S-adenosylmethionine synthetase, putative                        | null                | -                                                                         |
| PVX_099535 | phosphoglycerate kinase, putative                                | null                | -                                                                         |
| PVX_101200 | actin                                                            | null                | actin cytoskeleton, actin filament                                        |
| PVX_101400 | osmiophilic body protein, putative                               | G377                | -                                                                         |
| PVX_115450 | hypothetical protein, conserved                                  | null                | -                                                                         |
| PVX_117030 | RNA helicase-1, putative                                         | null                | eukaryotic translation initiation factor 4F complex                       |
| PVX_117322 | glyceraldehyde-3-phosphate dehydrogenase, putative               | GAPDH               | -                                                                         |

|            |                                               |       |   |
|------------|-----------------------------------------------|-------|---|
| PVX_117925 | elongation factor 2, putative                 | EF2   | - |
| PVX_121935 | Plasmodium exported protein, unknown function | null  | - |
| PVX_123745 | endoplasmin, putative                         | GRP94 | - |



**Additional table 4B.** GO classification of *P. vivax* proteins detected in parasite isolates

| Gene ID    | Product Description                                | Gene Name or Symbol | Computed GO Components                                              |
|------------|----------------------------------------------------|---------------------|---------------------------------------------------------------------|
| PVX_003545 | Plasmodium exported protein, unknown function      | null                | membrane                                                            |
| PVX_003555 | Plasmodium exported protein, unknown function      | null                | -                                                                   |
| PVX_082845 | elongation factor 1-gamma, putative                | null                | eukaryotic translation elongation factor 1 complex                  |
| PVX_083555 | hypothetical protein                               | null                | -                                                                   |
| PVX_083560 | Plasmodium exported protein, unknown function      | null                | -                                                                   |
| PVX_087950 | heat shock protein 86, putative                    | null                | -                                                                   |
| PVX_088960 | protein disulfide isomerase, putative              | null                | endoplasmic reticulum, endoplasmic reticulum lumen                  |
| PVX_089425 | heat shock 70 kDa protein, putative                | null                | -                                                                   |
| PVX_089505 | 14-3-3 protein, putative                           | 14-3-3I             | -                                                                   |
| PVX_091515 | GTP-binding nuclear protein RAN/TC4, putative      | null                | intracellular, membrane, nucleus                                    |
| PVX_092065 | spermidine synthase, putative                      | null                | -                                                                   |
| PVX_093680 | Phist protein (Pf-fam-b)                           | null                | apicoplast                                                          |
| PVX_094303 | Pvstp1, putative                                   | null                | -                                                                   |
| PVX_094635 | tubulin beta chain, putative                       | null                | cytoplasm, microtubule, protein-containing complex, tubulin complex |
| PVX_095000 | heat shock protein 60, putative                    | null                | cytoplasm, mitochondrion                                            |
| PVX_096070 | early transcribed membrane protein (ETRAPM)        | null                | -                                                                   |
| PVX_097583 | skeleton-binding protein 1, putative               | SBP1                | -                                                                   |
| PVX_099315 | heat shock protein 70, putative                    | null                | -                                                                   |
| PVX_099525 | S-adenosylmethionine synthetase, putative          | null                | -                                                                   |
| PVX_101200 | actin                                              | null                | actin cytoskeleton, actin filament                                  |
| PVX_101400 | osmiophilic body protein, putative                 | G377                | -                                                                   |
| PVX_115450 | hypothetical protein, conserved                    | null                | -                                                                   |
| PVX_117030 | RNA helicase-1, putative                           | null                | eukaryotic translation initiation factor 4F complex                 |
| PVX_117322 | glyceraldehyde-3-phosphate dehydrogenase, putative | GAPDH               | -                                                                   |
| PVX_117925 | elongation factor 2, putative                      | null                | -                                                                   |
| PVX_121935 | Plasmodium exported protein, unknown function      | null                | -                                                                   |
| PVX_001685 | Phist protein (Pf-fam-b)                           | null                | -                                                                   |
| PVX_002650 | 40S ribosomal protein S26, putative                | RPS26               | intracellular, ribosome                                             |
| PVX_003665 | hexose transporter                                 | null                | integral component of membrane, membrane                            |
| PVX_003730 | 26S proteasome regulatory subunit RPN1, putative   | RPN1                | proteasome complex, proteasome regulatory particle                  |
| PVX_003905 | 6-cysteine protein                                 | null                | plasma membrane                                                     |
| PVX_080100 | multidrug resistance protein 1, putative           | MDR1                | integral component of membrane                                      |
| PVX_080400 | 60S ribosomal protein L12, putative                | null                | ribosome                                                            |
| PVX_080405 | 60S ribosomal protein L2, putative                 | RPL2                | intracellular, large ribosomal subunit, ribosome                    |

|            |                                                          |        |                                                                                                                                                                                |
|------------|----------------------------------------------------------|--------|--------------------------------------------------------------------------------------------------------------------------------------------------------------------------------|
| PVX_080440 | 40S ribosomal protein S11, putative                      | null   | cytosolic small ribosomal subunit, ribosome                                                                                                                                    |
| PVX_080555 | 6-cysteine protein                                       | PSOP12 | -                                                                                                                                                                              |
| PVX_080650 | inositol-3-phosphate synthase, putative                  | INO1   | -                                                                                                                                                                              |
| PVX_081455 | calcium-transporting ATPase, putative                    | null   | integral component of membrane                                                                                                                                                 |
| PVX_082840 | 60S ribosomal protein L6, putative                       | null   | cytosolic large ribosomal subunit, intracellular, ribosome                                                                                                                     |
| PVX_083045 | phosphoethanolamine N-methyltransferase                  | PMT    | -                                                                                                                                                                              |
| PVX_083205 | protein transport protein SEC61 subunit alpha, putative  | null   | membrane                                                                                                                                                                       |
| PVX_083240 | 6-cysteine protein                                       | null   | membrane                                                                                                                                                                       |
| PVX_083270 | DNA/RNA-binding protein Alba 4, putative                 | ALBA4  | -                                                                                                                                                                              |
| PVX_083515 | protein disulfide-isomerase, putative                    | null   | -                                                                                                                                                                              |
| PVX_084795 | mitochondrial acidic protein MAM33, putative             | null   | mitochondrial matrix                                                                                                                                                           |
| PVX_085645 | hypothetical protein, conserved                          | null   | membrane                                                                                                                                                                       |
| PVX_085735 | 60S ribosomal protein L10, putative                      | null   | cytosolic large ribosomal subunit, intracellular, ribosome                                                                                                                     |
| PVX_085830 | actin II                                                 | null   | actin cytoskeleton, actin filament                                                                                                                                             |
| PVX_086020 | 40S ribosomal protein S8e, putative                      | null   | cytosolic small ribosomal subunit, intracellular, mitochondrion, ribosome                                                                                                      |
| PVX_088205 | vacuolar proton translocating ATPase subunit A, putative | null   | obsolete membrane fraction, proton-transporting V-type ATPase, V0 domain, proton-transporting two-sector ATPase complex, vacuolar proton-transporting V-type ATPase, V0 domain |
| PVX_089025 | receptor for activated c kinase, putative                | null   | heterotrimeric G-protein complex                                                                                                                                               |
| PVX_089635 | phosphoglucomutase-2, putative                           | PGM2   | -                                                                                                                                                                              |
| PVX_090155 | tubulin alpha chain, putative                            | null   | microtubule, protein-containing complex, tubulin complex                                                                                                                       |
| PVX_090265 | tryptophan-rich antigen (Pv-fam-a)                       | null   | -                                                                                                                                                                              |
| PVX_090275 | tryptophan-rich antigen (Pv-fam-a)                       | null   | -                                                                                                                                                                              |
| PVX_090950 | 40S ribosomal protein S4, putative                       | null   | intracellular, mitochondrion, ribosome, small ribosomal subunit                                                                                                                |
| PVX_091470 | heat shock protein 101, putative                         | HSP101 | apicoplast                                                                                                                                                                     |
| PVX_091700 | circumsporozoite-related antigen, putative               | EXP1   | membrane                                                                                                                                                                       |
| PVX_091790 | hypothetical protein, conserved                          | null   | membrane                                                                                                                                                                       |
| PVX_092070 | parasitophorous vacuolar protein 1, putative             | PV1    | -                                                                                                                                                                              |
| PVX_092120 | 60S acidic ribosomal protein P0, putative                | null   | cytosolic large ribosomal subunit, intracellular, mitochondrion, ribosome                                                                                                      |
| PVX_092310 | heat shock protein 70, putative                          | null   | -                                                                                                                                                                              |
| PVX_092315 | protein disulfide isomerase, putative                    | null   | endoplasmic reticulum lumen                                                                                                                                                    |
| PVX_092990 | tryptophan-rich antigen (Pv-fam-a)                       | null   | -                                                                                                                                                                              |
| PVX_092995 | tryptophan-rich antigen (Pv-fam-a)                       | null   | -                                                                                                                                                                              |
| PVX_094295 | Pv-fam-h protein                                         | null   | -                                                                                                                                                                              |
| PVX_094375 | 40S ribosomal protein S20e, putative                     | null   | cytosolic small ribosomal subunit, ribosome, small ribosomal subunit                                                                                                           |

|            |                                                                   |        |                                                                                                                                                               |
|------------|-------------------------------------------------------------------|--------|---------------------------------------------------------------------------------------------------------------------------------------------------------------|
| PVX_094400 | 60S ribosomal protein L13a, putative                              | null   | cytosolic large ribosomal subunit, large ribosomal subunit, ribosome                                                                                          |
| PVX_094535 | RNA-binding protein, putative                                     | null   | -                                                                                                                                                             |
| PVX_095015 | enolase, putative                                                 | null   | phosphopyruvate hydratase complex                                                                                                                             |
| PVX_095080 | 40S ribosomal protein S3A, putative                               | null   | cytosolic small ribosomal subunit, intracellular, ribosome                                                                                                    |
| PVX_096265 | 40S ribosomal protein S5, putative                                | null   | cytosolic small ribosomal subunit, small ribosomal subunit                                                                                                    |
| PVX_096975 | VIR protein                                                       | null   | -                                                                                                                                                             |
| PVX_096985 | variable surface protein Vir, putative                            | null   | -                                                                                                                                                             |
| PVX_096995 | tryptophan-rich antigen (Pv-fam-a)                                | null   | -                                                                                                                                                             |
| PVX_097625 | merozoite surface protein 8, putative                             | null   | membrane                                                                                                                                                      |
| PVX_097845 | hypothetical protein, conserved                                   | null   | -                                                                                                                                                             |
| PVX_097915 | 60S ribosomal protein L4, putative                                | RPL4   | large ribosomal subunit, ribosome                                                                                                                             |
| PVX_098712 | high molecular weight rhoptry protein 3, putative                 | RhopH3 | -                                                                                                                                                             |
| PVX_099055 | alkaline phosphatase, putative                                    | null   | -                                                                                                                                                             |
| PVX_099370 | DNAJ-like molecular chaperone protein, putative                   | null   | -                                                                                                                                                             |
| PVX_100735 | ATP synthase subunit beta, mitochondrial, putative                | null   | integral component of membrane, mitochondrion, proton-transporting two-sector ATPase complex, proton-transporting two-sector ATPase complex, catalytic domain |
| PVX_100835 | conserved protein, unknown function                               | null   | membrane                                                                                                                                                      |
| PVX_101515 | tryptophan-rich antigen (Pv-fam-a)                                | null   | -                                                                                                                                                             |
| PVX_112110 | unspecified product                                               | null   | -                                                                                                                                                             |
| PVX_112670 | unspecified product                                               | null   | -                                                                                                                                                             |
| PVX_113465 | long chain polyunsaturated fatty acid elongation enzyme, putative | null   | integral component of membrane                                                                                                                                |
| PVX_114095 | cell division cycle protein 48 homologue, putative                | null   | obsolete microsome                                                                                                                                            |
| PVX_114315 | hexokinase, putative                                              | null   | -                                                                                                                                                             |
| PVX_114445 | pyruvate kinase, putative                                         | null   | -                                                                                                                                                             |
| PVX_115460 | Plasmodium exported protein, unknown function                     | null   | -                                                                                                                                                             |
| PVX_116915 | exported protein 2, putative                                      | EXP2   | symbiont-containing vacuole membrane                                                                                                                          |
| PVX_117170 | 40S ribosomal protein S3, putative                                | null   | cytosolic small ribosomal subunit, ribosome, small ribosomal subunit                                                                                          |
| PVX_117615 | signal peptide peptidase, putative                                | SPP    | apicoplast, integral component of membrane                                                                                                                    |
| PVX_117625 | V-type H(+)-translocating pyrophosphatase, putative               | VP1    | membrane                                                                                                                                                      |
| PVX_118145 | 40S ribosomal protein S5, putative                                | null   | cytosolic small ribosomal subunit, ribosome, small ribosomal subunit                                                                                          |
| PVX_118695 | Pv-fam-d protein                                                  | null   | -                                                                                                                                                             |
| PVX_121930 | Plasmodium exported protein, unknown function                     | null   | -                                                                                                                                                             |
| PVX_122930 | histone H2B variant, putative                                     | H2B.Z  | nucleosome, nucleus                                                                                                                                           |
| PVX_123070 | 60S ribosomal protein L13, putative                               | null   | cytosolic large ribosomal subunit, intracellular, ribosome                                                                                                    |
| PVX_123340 | eukaryotic translation initiation factor 3 subunit 10, putative   | null   | eukaryotic translation initiation factor 3 complex                                                                                                            |

|            |                                                   |      |   |
|------------|---------------------------------------------------|------|---|
| PVX_123845 | polyadenylate-binding protein,<br>putative        | null | - |
| PVX_123935 | haloacid dehalogenase-like hydrolase,<br>putative | HAD3 | - |

**Additional table 5.** List of proteins and peptides selected for the MRM assay

| S.no. | Peptides                      | Protein     |
|-------|-------------------------------|-------------|
| 1     | LSEQELIQLLR                   | PVX_003545* |
| 2     | MPFDSPEQMLQFLK                |             |
| 3     | <b>TYLLLYTSLVK</b>            |             |
| 4     | DVSNVAPLILPALPPLLMMFIGTQR     |             |
| 5     | LISSIFGFDEEDIDSR              | PVX_083555  |
| 6     | VTLESPDNAEIDMSS               |             |
| 7     | IESLDYLSLFK                   |             |
| 8     | DNIFITNVLDQWIK                | PVX_090265  |
| 9     | GVSGLPSSNSLQEITLR             |             |
| 10    | <b>LFGITSPEDTWLTDIEKPLVAK</b> | PVX_094303* |
| 11    | <b>ENLPDEIDVENLTK</b>         |             |
| 12    | <b>SALQSMLESEFIK</b>          | PVX_101520* |
| 13    | MYGVYDEQK                     |             |

\*Proteins chosen for targeted proteomics assay. The peptides represented in bold showed consistent results among all the 8 plasma samples in the initial round of experiments

Additional figure 1. Representative peptides unique to *P. vivax* monitored using PRM assay

**DNIFITNVLDQWIK**

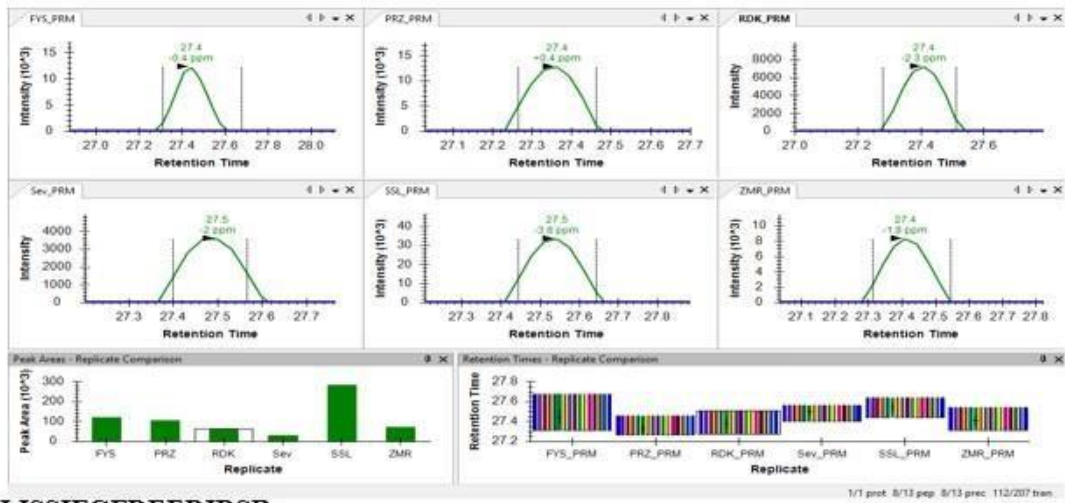

**LISSIFGFDEEDISR**

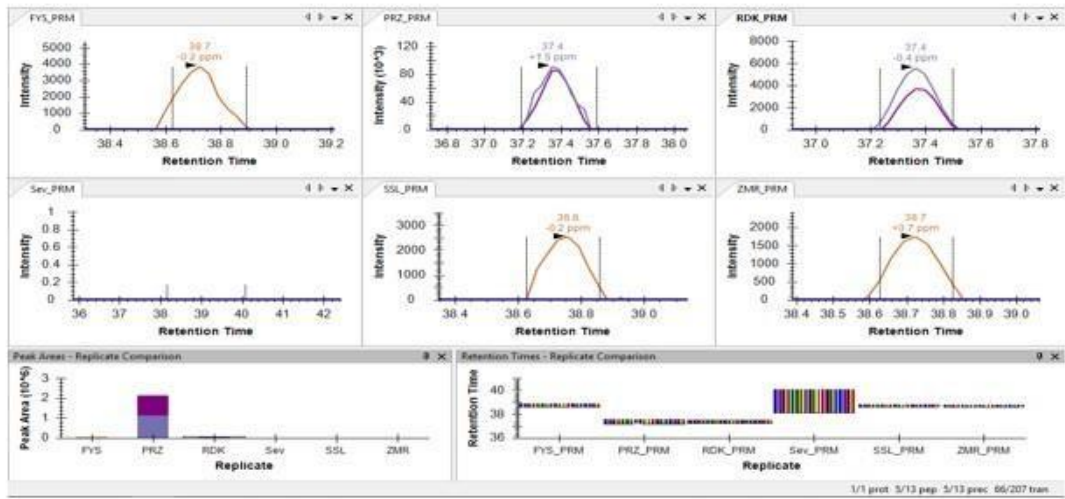

**MPFDSPEQMLQLFK**

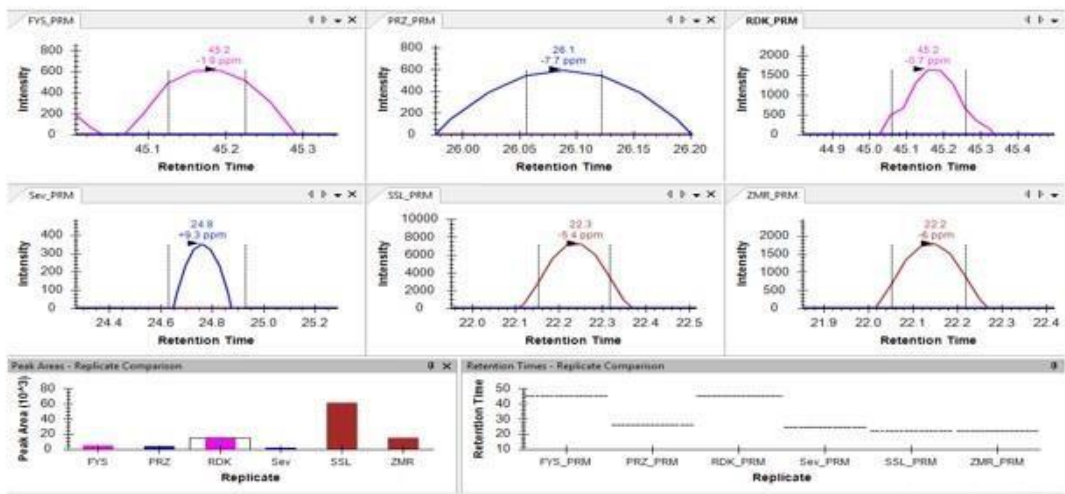

**Additional figure 2.** Sequence alignment of unique *P. vivax* proteins A) PVX\_094303 B) PVX\_003555 C) PVX\_003545 D) PVX\_121935 E) PVX\_083555 and corresponding top *P. falciparum* hits using Clustal Omega. Certain regions of the protein sequences having highest dissimilarity between the two species are highlighted

**A. Pvstp1, putative (PVX\_094303)**

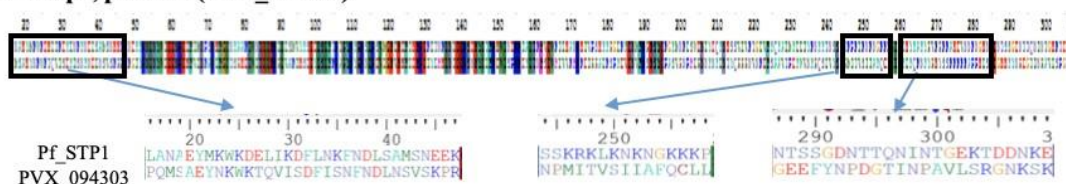

**B. Plasmodium exported protein (PVX\_003555)**

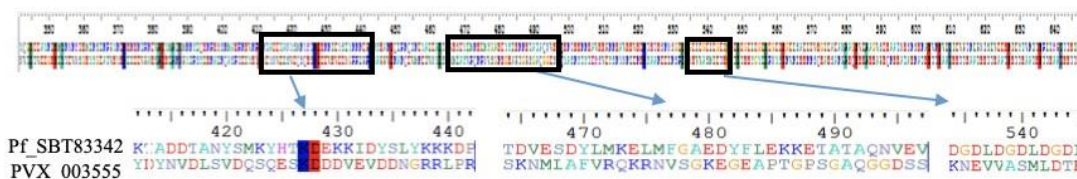

**C. Plasmodium exported protein (PVX\_003545)**

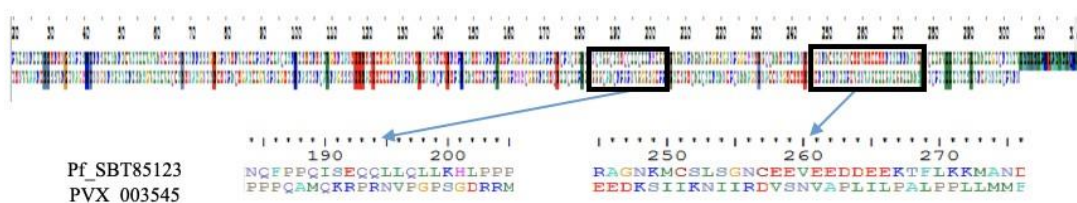

**D. Plasmodium exported protein (PVX\_121935)**

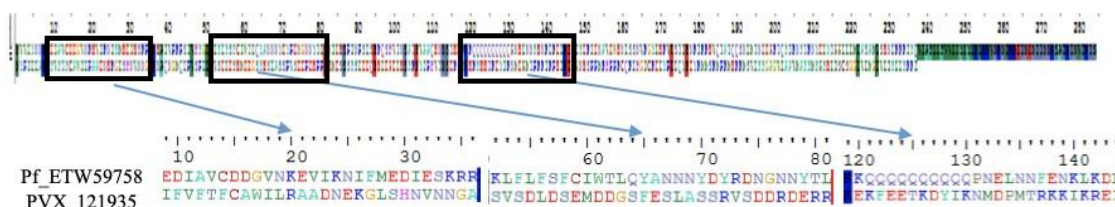

**E. Hypothetical protein (PVX\_083555)**

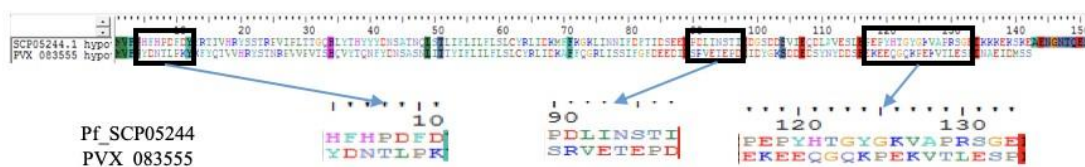

**Additional figure 3.** Standardization of peptide validation experiments using a targeted proteomics approach. The left panel shows a representative optimized MRM assay for sorted peptides. The top right panel shows the comparison of retention time in all the individual samples. The bottom left panel shows the comparison of Peak area in the plasma sample runs as Biological replicates. The experiment was performed for four peptides.

**(a) TYLLLYTSLVK - PVX\_003545**

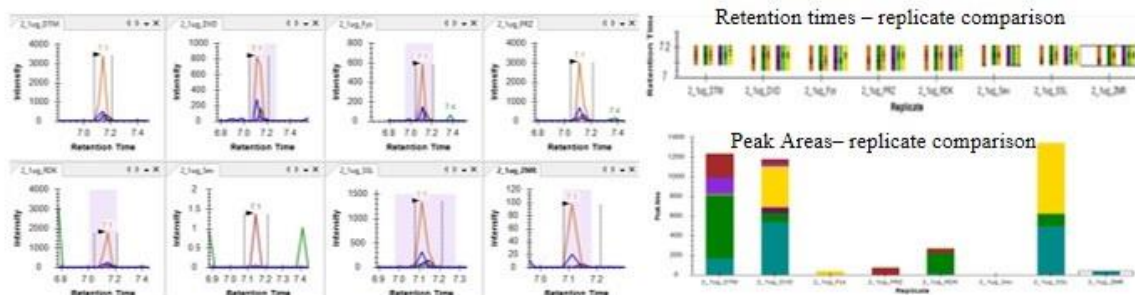

**(b) LFGITSPEDTWLTDIEKPLVAK - PVX\_094303**

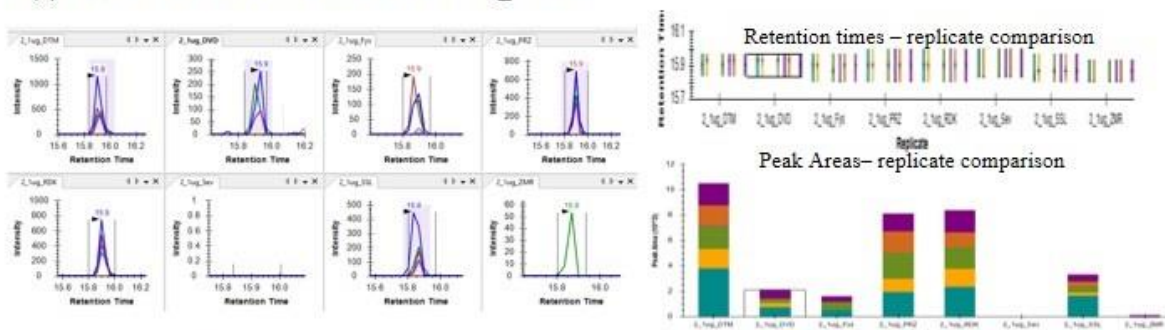

**(c) ENLPDEIDVENLTK - PVX\_094303**

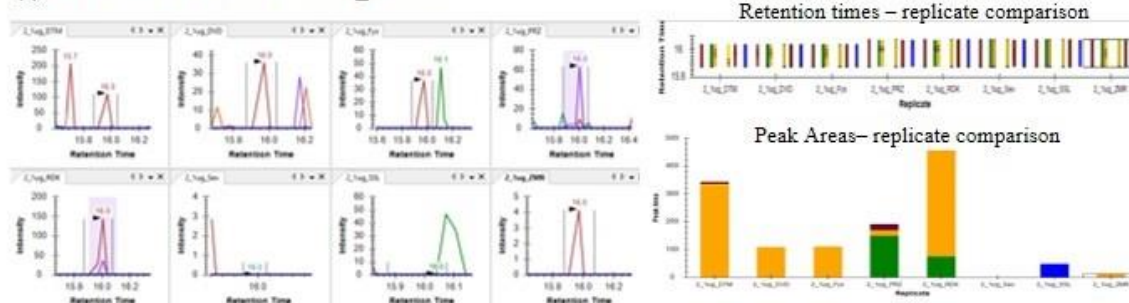

**(d) SALQSMLESFIK - PVX\_101520**

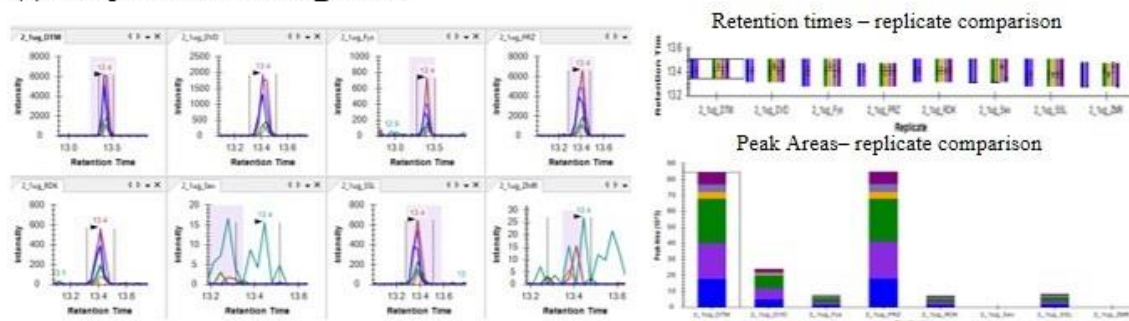

Supplement: MOESM1 [file 17760842]
